# Supplementary material for: Identification of Key Regions Mediating Human Melatonin Type 1 Receptor Functional Selectivity Revealed by Natural Variants
Source: PubMed Central journal article supplement — ACS Pharmacol Transl Sci. 2021 Sep 1;4(5):1614–27. doi: 10.1021/acsptsci.1c00157 (PMC8507577; doi:10.1021/acsptsci.1c00157), 2021-09-01
Supplement: pt1c00157_si_001.pdf [file pt1c00157_si_001.pdf]

## Supporting information:

### Identification of key regions mediating human melatonin type 1 receptor functional selectivity revealed by natural variants

Alan Hegron<sup>1,2,3,14</sup>, Eunna Huh<sup>4</sup>, Xavier Deupi<sup>5,6</sup>, Badr Sokrat<sup>2,3</sup>, Wenwen Gao<sup>1</sup>, Christian Le Gouill<sup>3</sup>, Mickaël Canouil<sup>7,8,9</sup>, Mathilde Boissel<sup>7,8,9</sup>, Guillaume Charpentier<sup>10</sup>, Ronan Roussel<sup>11</sup>, Beverley Balkau<sup>12</sup>, Philippe Froguel<sup>7,8,9</sup>, Bianca Plouffe<sup>2,3,15</sup>, Amélie Bonnefond<sup>7,8,9</sup>, Olivier Lichtarge<sup>4,13</sup>, Ralf Jockers<sup>1\*</sup>, Michel Bouvier<sup>2,3\*</sup>

#### Authors and affiliation.

<sup>1</sup>Université de Paris, Institut Cochin, CNRS, INSERM, F-75014 Paris, France

<sup>2</sup>Department of Biochemistry and Molecular Medicine, University de Montréal, Montreal, QC, Canada

<sup>3</sup>Institute for Research in Immunology and Cancer, University of Montreal, QC, Canada

<sup>4</sup>Department of Pharmacology, Baylor College of Medicine, Houston, TX 77030, United States of America

<sup>5</sup>Laboratory of Biomolecular Research, Paul Scherrer Institute (PSI), 5232 Villigen PSI, Switzerland

<sup>6</sup>Condensed Matter Theory group, Paul Scherrer Institute (PSI), 5232 Villigen PSI, Switzerland

<sup>7</sup>Inserm UMR1283, CNRS UMR8199, European Genomic Institute for Diabetes (EGID), Institut Pasteur de Lille, Lille, 59000, France;

<sup>8</sup>University of Lille, Lille University Hospital, Lille, 59000, France;

<sup>9</sup>Department of Metabolism, Imperial College London, London, W12 0NN, United Kingdom;

<sup>10</sup>CERITD (Centre d'Étude et de Recherche pour l'Intensification du Traitement du Diabète), Evry, France

<sup>11</sup>Department of Diabetology Endocrinology Nutrition, Hôpital Bichat, DHU FIRE, Assistance Publique Hôpitaux de Paris, Paris, France // Inserm U1138, Centre de Recherche des Cordeliers, Paris, France // UFR de Médecine, University Paris Diderot, Sorbonne Paris Cité, Paris, France

<sup>12</sup>Inserm U1018, Center for Research in Epidemiology and Population Health, Villejuif, France // University Paris-Saclay, University Paris-Sud, Villejuif, France

<sup>13</sup>Department of Molecular and Human Genetics, Baylor College of Medicine, Houston, TX 77030, United States of America

<sup>14</sup>Present address: Dept. of Molecular Pathobiology, New York University College of Dentistry, New York

<sup>15</sup>Present address: The Wellcome-Wolfson Institute for Experimental Medicine, Queen's University Belfast, Belfast, BT9 7BL, United Kingdom

**\*Corresponding authors:** Ralf Jockers, University of Paris, Institut Cochin, CNRS, INSERM, F-75014 Paris, France Email: [ralf.jockers@inserm.fr](mailto:ralf.jockers@inserm.fr) and Michel Bouvier, University of Montreal, 2900 Boulevard Édouard-Montpetit, Montréal, Quebec, H3T 1J4, Canada, E-mail: [michel.bouvier@umontreal.ca](mailto:michel.bouvier@umontreal.ca).

**Table of contents:**

**Figure S1.** Representation of the different BRET-based biosensors used for MT<sub>1</sub> characterization .....S-4

**Figure S2.** MT<sub>1</sub> variant receptors are as expressed at the cell surface as the MT<sub>1</sub>-WT.....S-5

**Figure S3.** Melatonin concentration-response curves for G protein activation and  $\beta$ arrestin-2 recruitment of the MT<sub>1</sub>-WT and the different variant profiles grouped in 3 clusters.....S-6

**Figure S4.** Radial graph representation of the different variant profiles grouped in 3 clusters .S-8

**Figure S5.** Kinetic of melatonin-induced MT<sub>1</sub> internalization in response to melatonin .....S-10

**Table S1.** Coding variants of *MTNR1A* (NM\_005958.4) which were accurately detected in 8,687 individuals .....S-11

**Table S2.** Association between *MTNR1A* coding variants and the risk of T2D, childhood obesity and adulthood obesity .....S-12

**Table S3.** Data from the functional characterization of variants .....S-13

## Supporting Figures

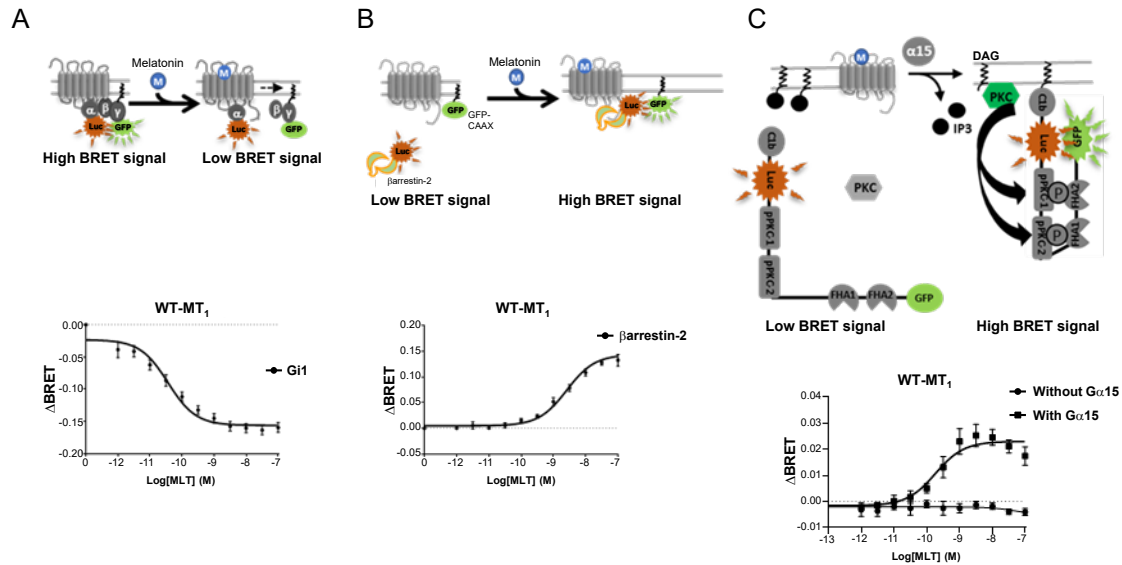

**Figure S1. Representation of the different BRET-based biosensors used for MT1 characterization.** (A) In basal condition, MT1 is bound to inactive complex  $\alpha\beta\gamma$  (left part). In our case, we used  $\alpha$  proteins fused to RlucII and  $\gamma$  proteins fused to GFP10. When melatonin is added, it binds to and activates the MT1 receptor leading to the dissociation of the complex (upper panel). RlucII too distant from GFP10 to transfer its energy, a decrease of BRET is observed (bottom panel). (B) For this experiment, we used  $\beta$ arrestin-2 fused to RlucII ( $\beta$ arrestin-2-RlucII) and the CAAX part of Kras protein which anchors to the plasma membrane fused to rGFP (CAAX-rGFP). In basal state,  $\beta$ arrestin-2 is not present at the plasma membrane (upper left panel). Upon MT1 activation by melatonin,  $\beta$ arrestin-2 is recruited to MT1 at the cell surface leading to a proximity between  $\beta$ arrestin-2-RlucII and CAAX-rGFP leading to an increase of EbBRET signal (upper right panel) as shown by the dose-response curve on the bottom panel. (C) The last BRET sensor used was the unimolecular biosensor of PKC activation. This biosensor contains the c1b domain of PKC $\delta$  able to bind DAG, RlucII, two specific phospho-substrate sequences (pPKC1 and pPKC2), two phospho-sensing domains (FHA1 and FHA2) and a rGFP (upper left panel). Upon MT1 activation by melatonin, G $\alpha$ 15 is activated leading to the activation of PLC, producing DAG and IP3 and PKC activation. This activated PKC and our biosensors are then able to bind to DAG present at the plasma membrane (upper right panel). PKC phosphorylates the biosensor, leading to its conformational change increasing the proximity of RlucII with rGFP and an increase of EbBRET (bottom panel).

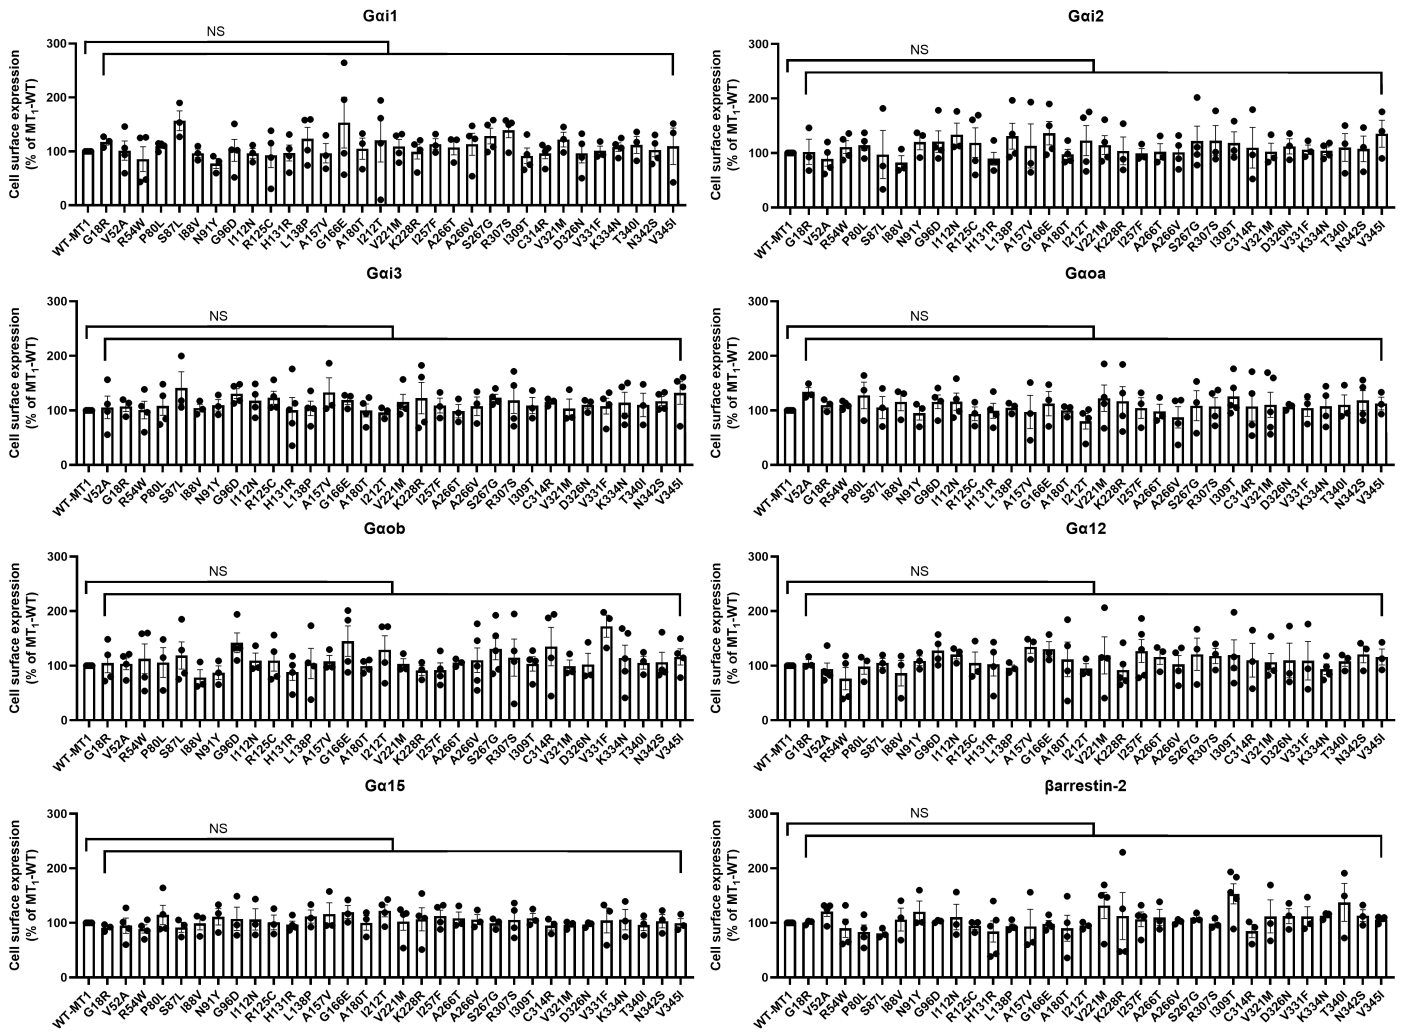

**Figure S2. MT1 variant receptors are as expressed at the cell surface as the MT1-WT.**

Cell surface expression of MT1 variants measured by enzyme-linked immunosorbent assay (ELISA) in HEK293 cells in parallel of BRET experiments for every G protein activation or  $\beta$ arrestin-2 recruitment. Cell surface expression of each variant was adjusted to MT1-WT. Statistical analysis was performed using one-sample t test. Data represents means  $\pm$  SEM of 3 to 6 experiments. Data were fitted in GraphPad Prism 9.

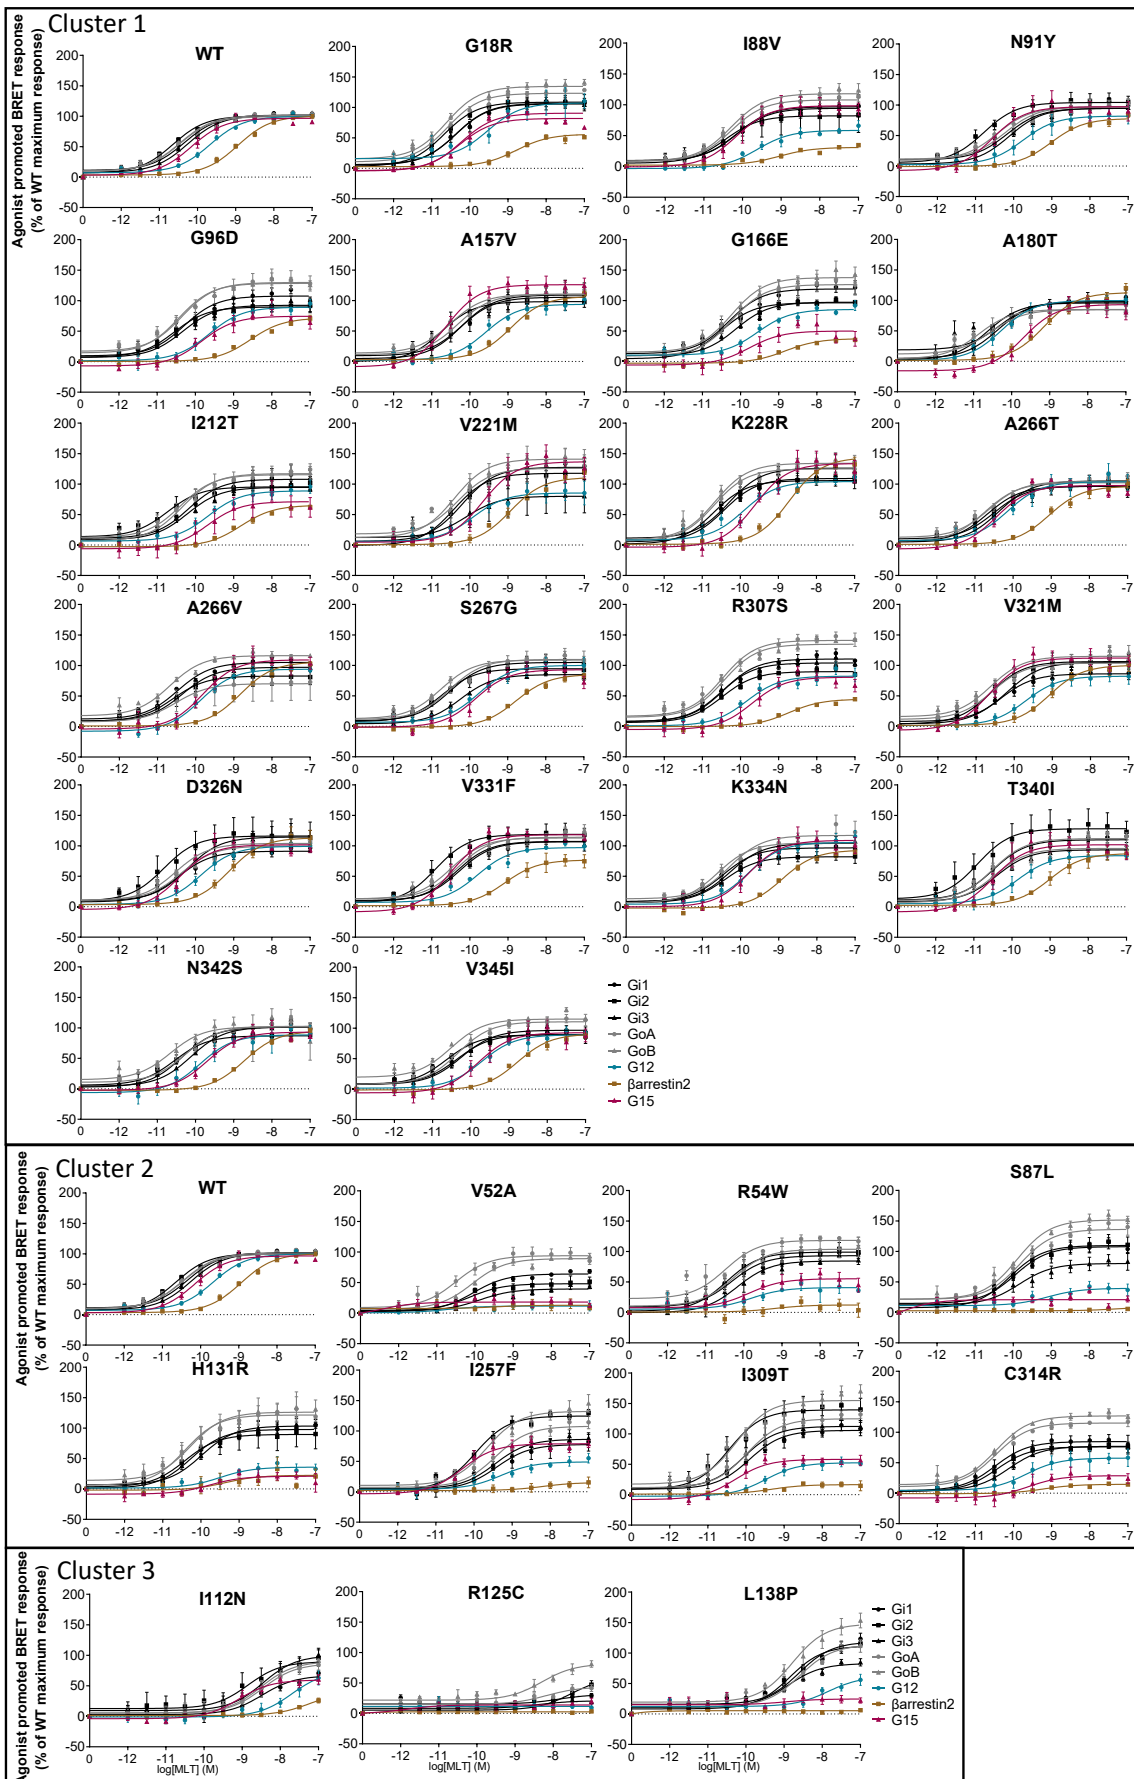

**Figure S3. Melatonin concentration-response curves for G protein activation and  $\beta$ arrestin-2 recruitment of the MT<sub>1</sub>-WT and the different variant profiles grouped in 3 clusters.**

Functional profile of the MT<sub>1</sub>-WT receptor and the first cluster corresponding to the 21 variants with a similar profile to the MT<sub>1</sub>-WT receptor. The cluster 2 groups 7 variants with a total loss of  $\beta$ arrestin-2 recruitment and generally an impairment of G $\alpha$ 12 and/or G $\alpha$ 15 activation. The cluster 3 groups 3 variants with a loss of  $\beta$ arrestin-2 recruitment and a defect for every maximal efficacy (Max) but with similar potencies (EC50) to the MT<sub>1</sub>-WT. Cell surface expression of each variant was adjusted to MT<sub>1</sub>-WT and monitored by ELISA. Experiments were repeated at least 3 times. Data were plotted using non-linear regression with a fixed Hill slope equal to 1. Data points represent means  $\pm$  SEM of 3 to 15 experiments. WT; wild-type. Data were fitted in GraphPad Prism 9.

### Cluster 1

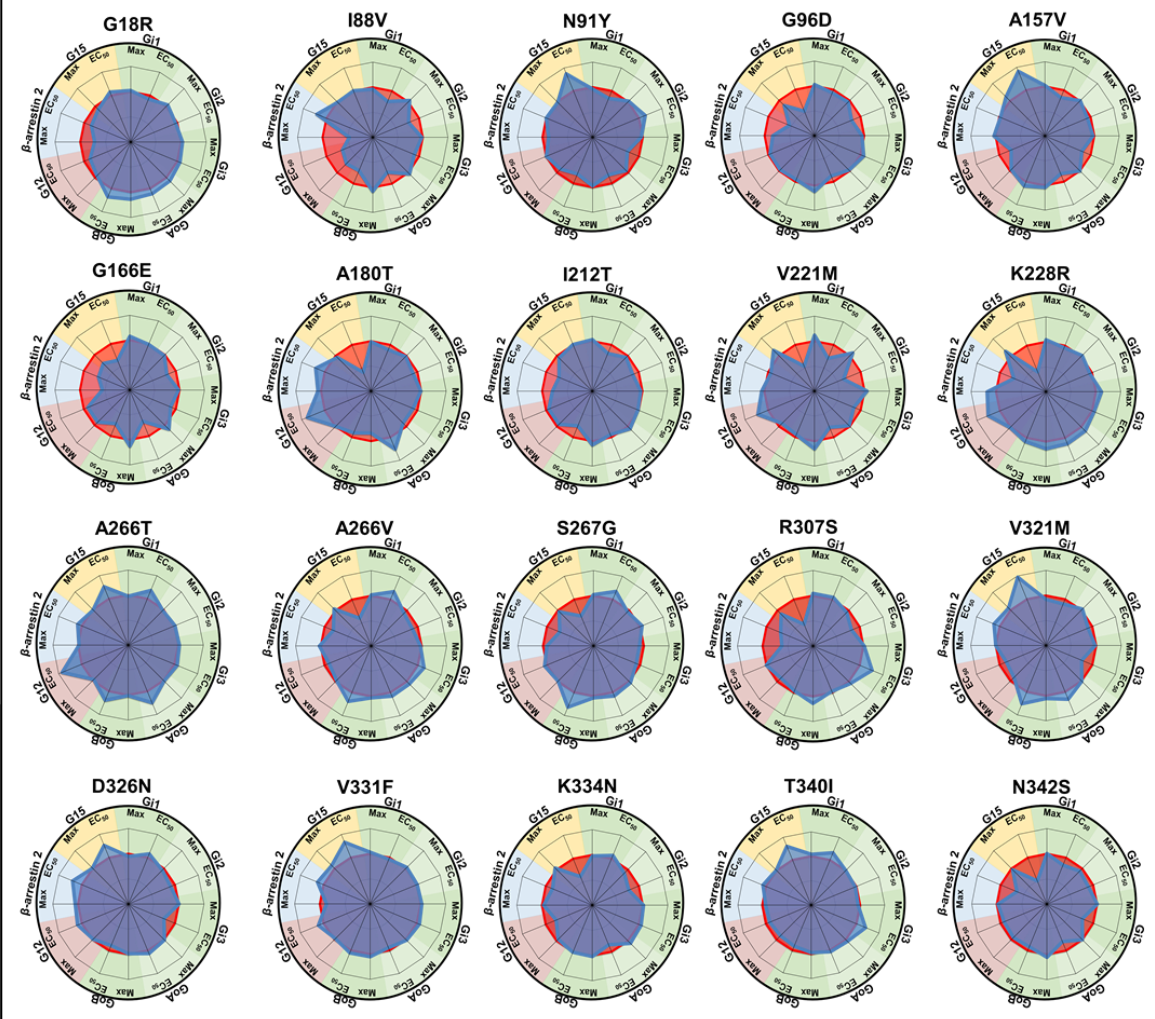

### Cluster 2

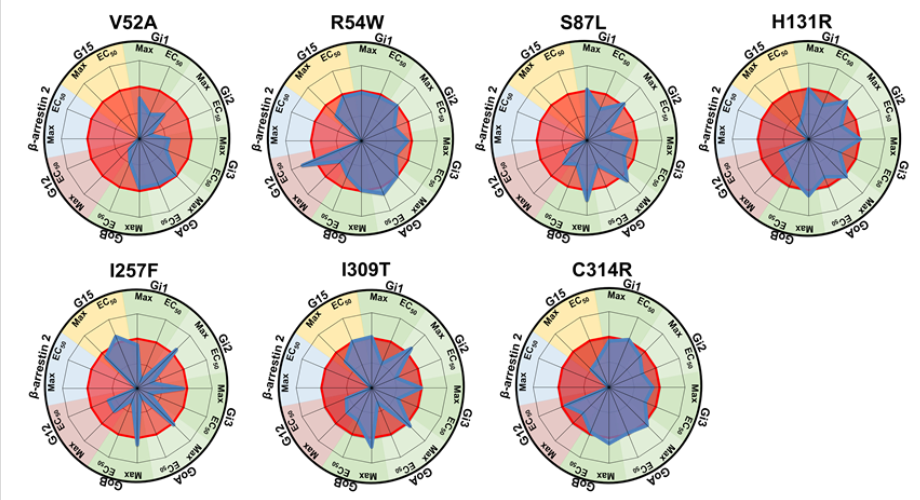

### Cluster 3

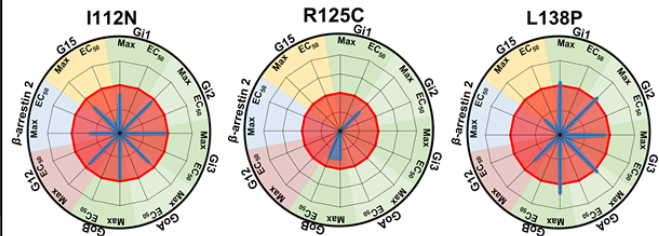



**Figure S4. Radial graph representation of the different variant profiles grouped in 3 clusters.**

On each radial graph for each MT<sub>1</sub> variant, maximal agonist-induced efficacy (Max) and potency (EC50) obtained by BRET are indicated. The three clusters were made regarding the profile of each variant. The first cluster corresponds to the 21 variants with a similar profile to the MT<sub>1</sub>-WT receptor. The cluster 2 groups 7 variants with a total loss of  $\beta$ arrestin-2 recruitment and generally an impairment of G $\alpha$  activation potencies, especially for G $\alpha$ 12 and/or G $\alpha$ 15. The cluster 3 groups 3 variants with a defect for every efficacy (Max) but generally with similar potencies (EC50) to the MT<sub>1</sub>-WT. WT profile is represented in red and mutant profiles are in blue. A loss of potency or efficacy for a specific protein results in the decrease of the blue area. Cell surface expression of each variant was adjusted to MT<sub>1</sub>-WT and monitored by ELISA. Data were fitted in Microsoft Excel 2016.

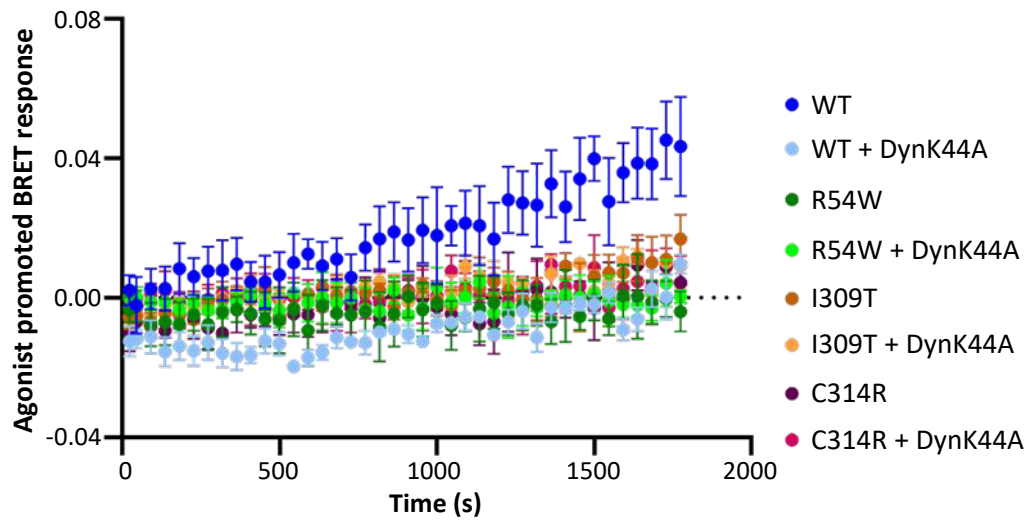

**Figure S5. Kinetic of melatonin-induced MT1 internalization in response to melatonin.**

Kinetic of melatonin-induced BRET response between MT1-WT (Blue), R54W (Green), I309T (Brown) and C314R (Purple) receptors fused to RlucII and the early endosome marker FYVE fused to rGFP, in absence (Dark curves) or presence (Clear curves) of the dominant negative Dynamin K44A (DynK44A) to inhibit endocytosis. Only MT1-WT receptor internalizes contrary to R54W, I309T and C314R. Data points represent means  $\pm$  SEM of 3 experiments. WT; wild-type. Data were fitted in GraphPad Prism 9.

## Supporting Tables

**Table S1. Coding variants of *MTNR1A* (NM\_005958.4) which were accurately detected in 8,687 individuals.** 2,102 cases and 4,008 controls were involved in the case-control study for type 2 diabetes; 991 cases and 985 controls were involved in the case-control study for childhood obesity; 1,301 cases and 2,621 controls were involved in the case-control study for adulthood obesity.

| Chr_Pos<br>(hg19) | Ref  | Mut  | Conse-<br>quence | AA<br>change | GnomAD | Minor Allele Count |      |                   |      |                   |      |
|-------------------|------|------|------------------|--------------|--------|--------------------|------|-------------------|------|-------------------|------|
|                   |      |      |                  |              |        | Type 2 diabetes    |      | Obesity Childhood |      | Obesity Adulthood |      |
|                   |      |      |                  |              |        | Control            | Case | Control           | Case | Control           | Case |
| 4_187476468       | C    | T    | NS               | p.G18R       | 1      | 0                  | 0    | 2                 | 0    | 0                 | 0    |
| 4_187476365       | A    | G    | NS               | p.V52A       | 1      | 3                  | 0    | 3                 | 1    | 1                 | 1    |
| 4_187476360       | G    | A    | NS               | p.R54W       | 1      | 0                  | 0    | 1                 | 1    | 0                 | 0    |
| 4_187476335       | C    | A    | SD               | p.?          | 1      | 0                  | 1    | 0                 | 0    | 0                 | 0    |
| 4_187455657       | G    | A    | NS               | p.P80L       | 1      | 1                  | 0    | 0                 | 0    | 0                 | 1    |
| 4_187455636       | G    | A    | NS               | p.S87L       | 1      | 0                  | 1    | 0                 | 0    | 0                 | 0    |
| 4_187455634       | T    | C    | NS               | p.I88V       | 1      | 1                  | 0    | 0                 | 0    | 1                 | 0    |
| 4_187455625       | T    | A    | NS               | p.N91Y       | 1      | 0                  | 1    | 0                 | 0    | 0                 | 1    |
| 4_187455617       | C    | T    | SG               | p.W93*       | 1      | 1                  | 0    | 0                 | 0    | 1                 | 0    |
| 4_187455609       | C    | T    | NS               | p.G96D       | 1      | 12                 | 10   | 2                 | 5    | 5                 | 1    |
| 4_187455561       | A    | T    | NS               | p.I112N      | 0      | 0                  | 1    | 0                 | 0    | 0                 | 1    |
| 4_187455523       | G    | A    | NS               | p.R125C      | 1      | 0                  | 1    | 0                 | 0    | 0                 | 0    |
| 4_187455504       | T    | C    | NS               | p.H131R      | 1      | 1                  | 0    | 1                 | 0    | 0                 | 1    |
| 4_187455483       | A    | G    | NS               | p.L138P      | 1      | 0                  | 1    | 0                 | 1    | 1                 | 0    |
| 4_187455426       | G    | A    | NS               | p.A157V      | 1      | 0                  | 1    | 0                 | 0    | 0                 | 0    |
| 4_187455399       | C    | T    | NS               | p.G166E      | 1      | 159                | 64   | 19                | 28   | 103               | 40   |
| 4_187455386       | G    | C    | SG               | p.Y170*      | 1      | 2                  | 2    | 1                 | 0    | 2                 | 0    |
| 4_187455358       | C    | T    | NS               | p.A180T      | 1      | 1                  | 1    | 0                 | 0    | 2                 | 0    |
| 4_187455261       | A    | G    | NS               | p.I212T      | 1      | 1                  | 29   | 1                 | 1    | 6                 | 5    |
| 4_187455235       | C    | T    | NS               | p.V221M      | 1      | 0                  | 0    | 0                 | 1    | 0                 | 1    |
| 4_187455213       | T    | C    | NS               | p.K228R      | 0      | 0                  | 1    | 0                 | 0    | 0                 | 0    |
| 4_187455127       | T    | A    | NS               | p.I257F      | 1      | 1                  | 0    | 0                 | 0    | 1                 | 0    |
| 4_187455100       | C    | T    | NS               | p.A266T      | 1      | 3                  | 0    | 3                 | 0    | 2                 | 1    |
| 4_187455099       | G    | A    | NS               | p.A266V      | 1      | 152                | 93   | 42                | 26   | 102               | 49   |
| 4_187455097       | T    | C    | NS               | p.S267G      | 0      | 0                  | 1    | 0                 | 0    | 0                 | 1    |
| 4_187454975       | C    | G    | NS               | p.R307S      | 0      | 1                  | 0    | 1                 | 0    | 0                 | 0    |
| 4_187454956       | A    | G    | NS               | p.C314R      | 1      | 1                  | 0    | 0                 | 0    | 1                 | 0    |
| 4_187454935       | C    | T    | NS               | p.V321M      | 1      | 1                  | 1    | 0                 | 0    | 0                 | 0    |
| 4_187454920       | C    | T    | NS               | p.D326N      | 1      | 0                  | 1    | 0                 | 1    | 0                 | 0    |
| 4_187454905       | C    | A    | NS               | p.V331F      | 1      | 0                  | 1    | 0                 | 0    | 0                 | 0    |
| 4_187454894       | T    | A    | NS               | p.K334N      | 1      | 26                 | 13   | 4                 | 4    | 16                | 4    |
|                   |      | CAGT |                  |              |        |                    |      |                   |      |                   |      |
| 4_187454882       | GGAG | del  | FS               | p.W333*      | 1      | 1                  | 1    | 0                 | 0    | 2                 | 0    |
|                   | ACGG |      |                  |              |        |                    |      |                   |      |                   |      |
|                   | TTTC |      |                  |              |        |                    |      |                   |      |                   |      |
| 4_187454877       | G    | A    | NS               | p.T340I      | 1      | 2                  | 0    | 0                 | 0    | 1                 | 0    |
| 4_187454871       | T    | C    | NS               | p.N342S      | 0      | 1                  | 0    | 0                 | 0    | 0                 | 0    |
| 4_187454863       | C    | T    | NS               | p.V345I      | 1      | 5                  | 2    | 2                 | 0    | 4                 | 3    |
| 4_187454843       | T    | A    | SL               | p.*351Yext*? | 0      | 1                  | 0    | 0                 | 0    | 0                 | 0    |

AA, amino acid; Chr, chromosome; Del, deletion; FS, frameshift variant; GnomAD, genome aggregation database browser (v2.1.1; 1: present, 0: absent); Mut, mutated allele; NS, non-synonymous variant; Pos, position (according to the human alignment hg19/GRCh37); Ref, reference allele; SD, splice-donor variant; SG, stop-gain variant; SL, stop-loss variant.

**Table S2. Association between *MTNR1A* coding variants and the risk of T2D, childhood obesity and adulthood obesity.**

| Study  | Variant                  | OR [CI]            | $P_{\pi}$ | $P_{\tau}$ | $P$    |
|--------|--------------------------|--------------------|-----------|------------|--------|
| CC T2D | Cluster of rare variants | 1.17 [0.759-1.78]  | 0.473     | 0.373      | 0.483  |
| CC ObC | Cluster of rare variants | 0.669 [0.302-1.47] | 0.315     | 0.464      | 0.427  |
| CC ObA | Cluster of rare variants | 0.706 [0.406-1.19] | 0.201     | 0.383      | 0.275  |
| CC T2D | p.G166E (rs28383653)     | 0.941 [0.676-1.30] | NA        | NA         | 0.712  |
| CC ObC | p.G166E (rs28383653)     | 2.28 [1.03-5.16]   | NA        | NA         | 0.0445 |
| CC ObA | p.G166E (rs28383653)     | 0.804 [0.546-1.16] | NA        | NA         | 0.257  |
| CC T2D | p.A266V (rs28383652)     | 1.15 [0.855-1.54]  | NA        | NA         | 0.347  |
| CC ObC | p.A266V (rs28383652)     | 0.757 [0.364-1.56] | NA        | NA         | 0.451  |
| CC ObA | p.A266V (rs28383652)     | 0.855 [0.596-1.21] | NA        | NA         | 0.387  |

CC, case-control study; CI, confidence interval; NA, not applicable; ObC, obesity childhood; ObA, obesity adulthood; OR, odds ratio;  $\pi$ , mean effect of the cluster;  $\tau$ , heterogeneous effect of the cluster

**Table S3. Data from the functional characterization of variants.** Summary of the functional profiling of (A) *Gai1*, *Gai2*, *Gai3*, (B) *GaoA*, *GaoB*, (C) *Gα12* and *Gα15* activation and  $\beta$ arrestin-2 recruitment by MT<sub>1</sub>-WT and MT<sub>1</sub> variants. Data represent the mean  $\pm$  SEM of 3-13 independent experiments with repeats in quadruplicate. Data were analyzed by comparing independent fits.

| A        |                 |                   |                  |                 |                   |                  |                 |                   |                  |
|----------|-----------------|-------------------|------------------|-----------------|-------------------|------------------|-----------------|-------------------|------------------|
| Receptor | Gi1             |                   |                  | Gi2             |                   |                  | Gi3             |                   |                  |
|          | Emax (% of WT)  | LogEC50           | Log(Tau/Ka)      | Emax (% of WT)  | LogEC50           | Log(Tau/Ka)      | Emax (% of WT)  | LogEC50           | Log(Tau/Ka)      |
| WT-MT1   |                 | -10.54 $\pm$ 0.04 | 10.44 $\pm$ 0.05 |                 | -10.75 $\pm$ 0.03 | 10.64 $\pm$ 0.04 |                 | -10.4 $\pm$ 0.03  | 10.29 $\pm$ 0.03 |
| G18R     | 104.9 $\pm$ 3.9 | -10.47 $\pm$ 0.11 | 10.39 $\pm$ 0.08 | 108.3 $\pm$ 2.3 | -10.72 $\pm$ 0.06 | 10.65 $\pm$ 0.07 | 106.1 $\pm$ 2.5 | -10.45 $\pm$ 0.06 | 10.38 $\pm$ 0.06 |
| I88V     | 92.9 $\pm$ 4.5  | -10.34 $\pm$ 0.13 | 10.21 $\pm$ 0.09 | 108.7 $\pm$ 2.4 | -10.55 $\pm$ 0.06 | 10.48 $\pm$ 0.08 | 95.67 $\pm$ 4.0 | -10.31 $\pm$ 0.12 | 10.19 $\pm$ 0.07 |
| N91Y     | 92.7 $\pm$ 2.7  | -10.4 $\pm$ 0.085 | 10.27 $\pm$ 0.09 | 103.6 $\pm$ 3.3 | -10.87 $\pm$ 0.09 | 10.78 $\pm$ 0.08 | 94.15 $\pm$ 2.6 | -10.18 $\pm$ 0.07 | 10.05 $\pm$ 0.07 |
| G96D     | 106.1 $\pm$ 3.3 | -10.48 $\pm$ 0.09 | 10.4 $\pm$ 0.09  | 91.39 $\pm$ 2.9 | -10.58 $\pm$ 0.09 | 10.43 $\pm$ 0.08 | 91.5 $\pm$ 3.1  | -10.46 $\pm$ 0.10 | 10.33 $\pm$ 0.09 |
| A157V    | 103.9 $\pm$ 5.0 | -10.4 $\pm$ 0.14  | 10.32 $\pm$ 0.08 | 101.5 $\pm$ 3.6 | -10.69 $\pm$ 0.10 | 10.6 $\pm$ 0.07  | 94.42 $\pm$ 2.0 | -10.23 $\pm$ 0.05 | 10.11 $\pm$ 0.07 |
| G166E    | 116.9 $\pm$ 3.8 | -10.53 $\pm$ 0.09 | 10.49 $\pm$ 0.09 | 95.86 $\pm$ 1.7 | -10.58 $\pm$ 0.05 | 10.46 $\pm$ 0.09 | 95.91 $\pm$ 2.4 | -10.3 $\pm$ 0.07  | 10.19 $\pm$ 0.08 |
| A180T    | 97.3 $\pm$ 3.4  | -10.45 $\pm$ 0.10 | 10.34 $\pm$ 0.10 | 95.66 $\pm$ 2.0 | -10.67 $\pm$ 0.06 | 10.55 $\pm$ 0.08 | 98.31 $\pm$ 2.3 | -10.32 $\pm$ 0.07 | 10.21 $\pm$ 0.08 |
| I212T    | 106.2 $\pm$ 4.9 | -10.38 $\pm$ 0.13 | 10.3 $\pm$ 0.09  | 91.02 $\pm$ 2.2 | -10.64 $\pm$ 0.07 | 10.5 $\pm$ 0.09  | 93.22 $\pm$ 2.2 | -10.39 $\pm$ 0.06 | 10.26 $\pm$ 0.09 |
| V221M    | 126.8 $\pm$ 2.5 | -10.28 $\pm$ 0.05 | 10.28 $\pm$ 0.08 | 117.8 $\pm$ 4.8 | -10.41 $\pm$ 0.11 | 10.38 $\pm$ 0.06 | 110.3 $\pm$ 4.8 | -10.27 $\pm$ 0.12 | 10.22 $\pm$ 0.06 |
| K228R    | 108.7 $\pm$ 2.7 | -10.5 $\pm$ 0.07  | 10.44 $\pm$ 0.09 | 105.7 $\pm$ 4.0 | -10.71 $\pm$ 0.11 | 10.64 $\pm$ 0.07 | 125.2 $\pm$ 4.0 | -10.44 $\pm$ 0.09 | 10.44 $\pm$ 0.07 |
| A266T    | 95.0 $\pm$ 4.3  | -10.7 $\pm$ 0.13  | 10.57 $\pm$ 0.08 | 95.82 $\pm$ 2.6 | -10.76 $\pm$ 0.08 | 10.64 $\pm$ 0.07 | 104.6 $\pm$ 2.9 | -10.45 $\pm$ 0.08 | 10.37 $\pm$ 0.06 |
| A266V    | 103.5 $\pm$ 2.2 | -10.69 $\pm$ 0.06 | 10.6 $\pm$ 0.08  | 85.24 $\pm$ 3.4 | -10.65 $\pm$ 0.12 | 10.48 $\pm$ 0.09 | 95.83 $\pm$ 2.8 | -10.52 $\pm$ 0.08 | 10.41 $\pm$ 0.08 |
| S267G    | 103.7 $\pm$ 2.9 | -10.69 $\pm$ 0.08 | 10.6 $\pm$ 0.10  | 92.13 $\pm$ 1.9 | -10.79 $\pm$ 0.06 | 10.66 $\pm$ 0.08 | 84.38 $\pm$ 2.0 | -10.33 $\pm$ 0.06 | 10.16 $\pm$ 0.09 |
| R307S    | 109.4 $\pm$ 2.7 | -10.58 $\pm$ 0.07 | 10.51 $\pm$ 0.09 | 89.15 $\pm$ 1.7 | -10.6 $\pm$ 0.05  | 10.45 $\pm$ 0.08 | 103.1 $\pm$ 2.7 | -10.64 $\pm$ 0.07 | 10.56 $\pm$ 0.08 |
| V321M    | 85.6 $\pm$ 3.0  | -10.45 $\pm$ 0.10 | 10.28 $\pm$ 0.10 | 106 $\pm$ 4.2   | -10.67 $\pm$ 0.11 | 10.59 $\pm$ 0.08 | 96.09 $\pm$ 2.3 | -10.2 $\pm$ 0.06  | 10.09 $\pm$ 0.08 |
| D326N    | 90.0 $\pm$ 2.7  | -10.61 $\pm$ 0.09 | 10.46 $\pm$ 0.10 | 90.44 $\pm$ 1.5 | -10.67 $\pm$ 0.05 | 10.53 $\pm$ 0.1  | 101.1 $\pm$ 2.5 | -10.19 $\pm$ 0.06 | 10.1 $\pm$ 0.08  |
| V331F    | 105.9 $\pm$ 3.6 | -10.51 $\pm$ 0.10 | 10.43 $\pm$ 0.08 | 105.8 $\pm$ 1.5 | -10.76 $\pm$ 0.04 | 10.68 $\pm$ 0.08 | 105.3 $\pm$ 3.1 | -10.45 $\pm$ 0.08 | 10.37 $\pm$ 0.06 |
| K334N    | 95.7 $\pm$ 2.3  | -10.6 $\pm$ 0.07  | 10.48 $\pm$ 0.09 | 81.25 $\pm$ 3.3 | -10.56 $\pm$ 0.12 | 10.37 $\pm$ 0.11 | 103 $\pm$ 2.5   | -10.44 $\pm$ 0.07 | 10.35 $\pm$ 0.08 |
| T340I    | 108.5 $\pm$ 2.5 | -10.68 $\pm$ 0.07 | 10.61 $\pm$ 0.08 | 100.3 $\pm$ 2.3 | -10.73 $\pm$ 0.06 | 10.63 $\pm$ 0.09 | 92.25 $\pm$ 3.8 | -10.58 $\pm$ 0.12 | 10.44 $\pm$ 0.07 |
| N342S    | 100.9 $\pm$ 3.4 | -10.4 $\pm$ 0.09  | 10.3 $\pm$ 0.10  | 86.42 $\pm$ 2.2 | -10.66 $\pm$ 0.07 | 10.49 $\pm$ 0.10 | 100.8 $\pm$ 2.1 | -10.19 $\pm$ 0.05 | 10.1 $\pm$ 0.08  |
| V345I    | 88.5 $\pm$ 4.0  | -10.53 $\pm$ 0.13 | 10.37 $\pm$ 0.10 | 88.46 $\pm$ 2.1 | -10.77 $\pm$ 0.07 | 10.62 $\pm$ 0.08 | 95.68 $\pm$ 1.9 | -10.39 $\pm$ 0.05 | 10.27 $\pm$ 0.08 |
| V52A     | 64.0 $\pm$ 1.7  | -10.07 $\pm$ 0.07 | 9.77 $\pm$ 0.16  | 49.33 $\pm$ 4.2 | -9.81 $\pm$ 0.22  | 9.401 $\pm$ 0.16 | 39.25 $\pm$ 1.7 | -9.98 $\pm$ 0.12  | 9.47 $\pm$ 0.18  |
| R54W     | 91.8 $\pm$ 3.0  | -10.49 $\pm$ 0.09 | 10.35 $\pm$ 0.11 | 98.79 $\pm$ 3.9 | -10.48 $\pm$ 0.11 | 10.38 $\pm$ 0.08 | 84.44 $\pm$ 3.0 | -10.16 $\pm$ 0.10 | 9.99 $\pm$ 0.10  |
| S87L     | 104.9 $\pm$ 3.4 | -10.25 $\pm$ 0.09 | 10.17 $\pm$ 0.1  | 108.7 $\pm$ 4.0 | -10.2 $\pm$ 0.10  | 10.13 $\pm$ 0.08 | 77.33 $\pm$ 4.1 | -10.22 $\pm$ 0.14 | 10.01 $\pm$ 0.10 |
| H131R    | 97.6 $\pm$ 2.6  | -10.29 $\pm$ 0.07 | 10.17 $\pm$ 0.10 | 111.6 $\pm$ 3.1 | -10.47 $\pm$ 0.08 | 10.42 $\pm$ 0.07 | 102.5 $\pm$ 3.1 | -10.09 $\pm$ 0.08 | 10.01 $\pm$ 0.08 |
| I257F    | 77.2 $\pm$ 5.1  | -9.482 $\pm$ 0.16 | 9.26 $\pm$ 0.12  | 124.3 $\pm$ 3.1 | -9.998 $\pm$ 0.06 | 9.991 $\pm$ 0.07 | 85.21 $\pm$ 3.7 | -9.57 $\pm$ 0.10  | 9.40 $\pm$ 0.08  |
| I309T    | 104.1 $\pm$ 2.8 | -10.09 $\pm$ 0.07 | 10 $\pm$ 0.08    | 126.5 $\pm$ 2.8 | -10.3 $\pm$ 0.06  | 10.3 $\pm$ 0.07  | 97.78 $\pm$ 2.5 | -9.99 $\pm$ 0.06  | 9.88 $\pm$ 0.08  |
| C314R    | 84.2 $\pm$ 4.1  | -10.56 $\pm$ 0.14 | 10.38 $\pm$ 0.12 | 75.89 $\pm$ 2.8 | -10.49 $\pm$ 0.10 | 10.27 $\pm$ 0.11 | 76.46 $\pm$ 1.7 | -10.2 $\pm$ 0.06  | 9.98 $\pm$ 0.10  |
| I112N    | 65.8 $\pm$ 5.6  | -8.555 $\pm$ 0.16 | 8.27 $\pm$ 0.15  | 83.08 $\pm$ 3.2 | -8.71 $\pm$ 0.07  | 8.528 $\pm$ 0.11 | 89.65 $\pm$ 3.2 | -8.49 $\pm$ 0.06  | 8.34 $\pm$ 0.08  |
| R125C    | NR              | NR                | NR               | 53.06 $\pm$ 6.8 | -7.798 $\pm$ 0.17 | 7.42 $\pm$ 0.22  | NR              | NR                | NR               |
| L138P    | 111.7 $\pm$ 6.5 | -8.948 $\pm$ 0.12 | 8.89 $\pm$ 0.1   | 109.1 $\pm$ 4.0 | -9.015 $\pm$ 0.07 | 8.951 $\pm$ 0.08 | 78.62 $\pm$ 3.7 | -9.23 $\pm$ 0.11  | 9.03 $\pm$ 0.11  |
| P80L     | NR              | NR                | NR               | NR              | NR                | NR               | NR              | NR                | NR               |

**B**

| Receptor | GoA               |               |              | GoB               |               |              |
|----------|-------------------|---------------|--------------|-------------------|---------------|--------------|
|          | Emax<br>(% of WT) | LogEC50       | Log(Tau/Ka)  | Emax<br>(% of WT) | LogEC50       | Log(Tau/Ka)  |
| WT-MT1   |                   | -10.65 ± 0.04 | 10.53 ± 0.04 |                   | -10.68 ± 0.04 | 10.5 ± 0.05  |
| G18R     | 121.9 ± 2.1       | -10.75 ± 0.05 | 10.71 ± 0.07 | 132.4 ± 2.8       | -10.84 ± 0.06 | 10.79 ± 0.06 |
| I88V     | 106.8 ± 3.0       | -10.43 ± 0.08 | 10.34 ± 0.08 | 116.7 ± 3.3       | -10.43 ± 0.08 | 10.33 ± 0.07 |
| N91Y     | 89.74 ± 2.1       | -10.49 ± 0.06 | 10.33 ± 0.12 | 94.97 ± 2.5       | -10.5 ± 0.07  | 10.31 ± 0.09 |
| G96D     | 95.62 ± 5.7       | -10.54 ± 0.17 | 10.4 ± 0.11  | 126.5 ± 2.9       | -10.64 ± 0.06 | 10.58 ± 0.08 |
| A157V    | 99.66 ± 2.1       | -10.5 ± 0.06  | 10.38 ± 0.10 | 108.5 ± 2.6       | -10.76 ± 0.07 | 10.62 ± 0.08 |
| G166E    | 124.9 ± 4.8       | -10.36 ± 0.11 | 10.34 ± 0.08 | 128.7 ± 4.2       | -10.44 ± 0.09 | 10.38 ± 0.07 |
| A180T    | 82.55 ± 2.6       | -10.88 ± 0.11 | 10.68 ± 0.14 | 72.56 ± 1.9       | -10.6 ± 0.08  | 10.29 ± 0.15 |
| I212T    | 113.7 ± 4.8       | -10.6 ± 0.12  | 10.54 ± 0.09 | 116.3 ± 2.8       | -10.46 ± 0.06 | 10.35 ± 0.09 |
| V221M    | 95.85 ± 5.8       | -10.46 ± 0.18 | 10.33 ± 0.11 | 136.7 ± 3.9       | -10.63 ± 0.09 | 10.6 ± 0.07  |
| K228R    | 124.4 ± 3.0       | -10.76 ± 0.08 | 10.73 ± 0.09 | 133.5 ± 3.7       | -10.75 ± 0.09 | 10.71 ± 0.08 |
| A266T    | 102.7 ± 2.8       | -10.87 ± 0.08 | 10.77 ± 0.08 | 101.5 ± 1.9       | -10.85 ± 0.05 | 10.69 ± 0.08 |
| A266V    | 115.3 ± 3.0       | -10.72 ± 0.08 | 10.67 ± 0.09 | 106.8 ± 3.5       | -10.85 ± 0.10 | 10.71 ± 0.08 |
| S267G    | 108.1 ± 3.6       | -10.72 ± 0.10 | 10.64 ± 0.10 | 107.3 ± 2.4       | -10.97 ± 0.07 | 10.83 ± 0.09 |
| R307S    | 111.5 ± 3.8       | -10.63 ± 0.18 | 10.56 ± 0.09 | 132.8 ± 3.2       | -10.65 ± 0.07 | 10.6 ± 0.07  |
| V321M    | 102 ± 2.4         | -10.79 ± 0.07 | 10.69 ± 0.09 | 112.6 ± 3.0       | -10.91 ± 0.08 | 10.79 ± 0.08 |
| D326N    | 102.5 ± 2.9       | -10.71 ± 0.08 | 10.6 ± 0.09  | 97.87 ± 2.6       | -10.59 ± 0.07 | 10.41 ± 0.09 |
| V331F    | 104.6 ± 2.6       | -10.6 ± 0.07  | 10.5 ± 0.10  | 110.9 ± 3.2       | -10.73 ± 0.08 | 10.61 ± 0.08 |
| K334N    | 115 ± 4.2         | -10.52 ± 0.10 | 10.46 ± 0.09 | 104.2 ± 2.0       | -10.69 ± 0.05 | 10.54 ± 0.08 |
| T340I    | 110.6 ± 2.8       | -10.68 ± 0.07 | 10.61 ± 0.08 | 94.81 ± 2.6       | -10.6 ± 0.08  | 10.41 ± 0.09 |
| N342S    | 100.9 ± 2.7       | -10.48 ± 0.07 | 10.36 ± 0.10 | 112.4 ± 3.7       | -10.61 ± 0.09 | 10.5 ± 0.08  |
| V345I    | 109.3 ± 2.5       | -10.47 ± 0.06 | 10.39 ± 0.09 | 112.4 ± 2.9       | -10.85 ± 0.08 | 10.15 ± 0.07 |
| V52A     | 93.59 ± 3.2       | -10.59 ± 0.10 | 10.45 ± 0.09 | 88.61 ± 2.4       | -10.18 ± 0.07 | 9.95 ± 0.10  |
| R54W     | 98.04 ± 6.2       | -10.77 ± 0.20 | 10.65 ± 0.10 | 96.33 ± 4.3       | -10.45 ± 0.13 | 10.27 ± 0.09 |
| S87L     | 131.2 ± 4.4       | -10.21 ± 0.09 | 10.21 ± 0.08 | 147.3 ± 4.6       | -10.22 ± 0.08 | 10.22 ± 0.07 |
| H131R    | 108.2 ± 5.8       | -10.47 ± 0.16 | 10.39 ± 0.09 | 124.4 ± 5.0       | -10.52 ± 0.12 | 10.45 ± 0.07 |
| I257F    | 105.9 ± 4.1       | -9.58 ± 0.09  | 9.48 ± 0.09  | 130.1 ± 4.4       | -9.83 ± 0.09  | 9.78 ± 0.07  |
| I309T    | 118.6 ± 2.6       | -9.92 ± 0.05  | 9.88 ± 0.09  | 143.3 ± 3.8       | -10.42 ± 0.07 | 10.41 ± 0.07 |
| C314R    | 113.8 ± 2.1       | -10.63 ± 0.05 | 10.57 ± 0.09 | 125.3 ± 3.0       | -10.64 ± 0.07 | 10.57 ± 0.08 |
| I112N    | 71.23 ± 4.5       | -8.34 ± 0.11  | 8.08 ± 0.14  | 87.96 ± 3.5       | -8.63 ± 0.07  | 8.41 ± 0.11  |
| R125C    | NR                | NR            | NR           | 55.41 ± 4.5       | -10.44 ± 0.23 | 10 ± 0.18    |
| L138P    | 109.2 ± 5.5       | -8.82 ± 0.10  | 8.74 ± 0.10  | 140 ± 7.2         | -9.12 ± 0.11  | 9.10 ± 0.07  |
| P80L     | NR                | NR            | NR           | NR                | NR            | NR           |

C

| Receptor | G12            |               |              | Barrestin-2    |              |             | G15            |              |             |
|----------|----------------|---------------|--------------|----------------|--------------|-------------|----------------|--------------|-------------|
|          | Emax (% of WT) | LogEC50       | Log(Tau/Ka)  | Emax (% of WT) | LogEC50      | Log(Tau/Ka) | Emax (% of WT) | LogEC50      | Log(Tau/Ka) |
| WT-MT1   |                | -9.84 ± 0.04  | 9.82 ± 0.04  |                | -9 ± 0.03    | 8.88 ± 0.02 |                | -9.14 ± 0.05 | 8.99 ± 0.06 |
| G18R     | 89.46 ± 5.6    | -9.73 ± 0.16  | 9.67 ± 0.11  | 55.8 ± 1.9     | -8.86 ± 0.09 | 8.53 ± 0.10 | 83.5 ± 2.0     | -9.20 ± 0.06 | 8.99 ± 0.11 |
| I88V     | 58.97 ± 2.8    | -9.53 ± 0.11  | 9.29 ± 0.15  | 30.39 ± 1.7    | -9.18 ± 0.12 | 8.53 ± 0.19 | 98.43 ± 5.1    | -9.15 ± 0.14 | 9.01 ± 0.11 |
| N91Y     | 82.38 ± 4.2    | -9.84 ± 0.13  | 9.74 ± 0.09  | 78.17 ± 2.1    | -9.00 ± 0.05 | 8.76 ± 0.07 | 97.41 ± 4.6    | -9.48 ± 0.13 | 9.33 ± 0.12 |
| G96D     | 94.22 ± 2.8    | -9.81 ± 0.07  | 9.77 ± 0.10  | 71.62 ± 1.7    | -8.57 ± 0.05 | 8.35 ± 0.07 | 75.22 ± 4.2    | -8.70 ± 0.14 | 8.44 ± 0.14 |
| A157V    | 93.69 ± 3.4    | -9.61 ± 0.09  | 9.57 ± 0.09  | 106.2 ± 2.1    | -8.98 ± 0.04 | 8.87 ± 0.05 | 126.5 ± 4.0    | -9.52 ± 0.09 | 9.49 ± 0.09 |
| G166E    | 83.89 ± 3.3    | -9.76 ± 0.10  | 9.68 ± 0.10  | 37.96 ± 1.2    | -8.71 ± 0.07 | 8.21 ± 0.13 | 60.05 ± 3.3    | -8.82 ± 0.14 | 8.46 ± 0.20 |
| A180T    | 99.08 ± 2.2    | -10.19 ± 0.06 | 10.17 ± 0.09 | 112.6 ± 3.6    | -9.17 ± 0.07 | 9.13 ± 0.05 | 90.96 ± 5.8    | -8.55 ± 0.15 | 8.37 ± 0.11 |
| I212T    | 87.93 ± 3.4    | -9.79 ± 0.10  | 9.72 ± 0.10  | 65.79 ± 1.8    | -8.74 ± 0.07 | 8.48 ± 0.07 | 88.05 ± 4.1    | -9.15 ± 0.12 | 8.96 ± 0.13 |
| V221M    | 84.5 ± 4.9     | -10.04 ± 0.15 | 9.96 ± 0.12  | 110.9 ± 2.5    | -8.94 ± 0.05 | 8.84 ± 0.05 | 136.2 ± 6.7    | -8.71 ± 0.12 | 8.71 ± 0.08 |
| K228R    | 102.7 ± 4.0    | -10.07 ± 0.10 | 10.07 ± 0.10 | 143.5 ± 4.8    | -8.72 ± 0.07 | 8.80 ± 0.05 | 134.2 ± 6.4    | -8.58 ± 0.12 | 8.57 ± 0.07 |
| A266T    | 94.77 ± 5.3    | -10.24 ± 0.15 | 10.21 ± 0.09 | 96.25 ± 2.4    | -9.07 ± 0.06 | 8.94 ± 0.05 | 97.98 ± 2.4    | -9.37 ± 0.07 | 9.23 ± 0.09 |
| A266V    | 94.74 ± 2.9    | -9.76 ± 0.08  | 9.72 ± 0.09  | 105.9 ± 1.9    | -8.83 ± 0.04 | 8.78 ± 0.04 | 109.6 ± 5.4    | -8.77 ± 0.12 | 8.67 ± 0.09 |
| S267G    | 98.97 ± 3.8    | -9.89 ± 0.10  | 9.87 ± 0.09  | 85.42 ± 1.8    | -8.75 ± 0.05 | 8.59 ± 0.05 | 93.02 ± 4.7    | -8.82 ± 0.13 | 8.65 ± 0.11 |
| R307S    | 82.27 ± 3.5    | -9.84 ± 0.11  | 9.75 ± 0.10  | 44.72 ± 1.0    | -8.72 ± 0.05 | 8.31 ± 0.11 | 80.99 ± 5.2    | -8.62 ± 0.16 | 8.4 ± 0.13  |
| V321M    | 82.19 ± 4.2    | -9.72 ± 0.13  | 9.62 ± 0.10  | 99.99 ± 2.6    | -9.10 ± 0.08 | 8.97 ± 0.06 | 112.4 ± 3.8    | -9.59 ± 0.10 | 9.51 ± 0.10 |
| D326N    | 98.68 ± 3.2    | -9.92 ± 0.08  | 9.90 ± 0.09  | 112.5 ± 4.0    | -9.17 ± 0.08 | 9.09 ± 0.05 | 101.9 ± 3.3    | -9.37 ± 0.09 | 9.25 ± 0.11 |
| V331F    | 95.75 ± 2.8    | -9.94 ± 0.07  | 9.91 ± 0.09  | 76.52 ± 3.9    | -9.11 ± 0.11 | 8.87 ± 0.07 | 118.6 ± 3.3    | -9.44 ± 0.08 | 9.38 ± 0.09 |
| K334N    | 91.81 ± 3.7    | -9.65 ± 0.10  | 9.60 ± 0.09  | 93.33 ± 1.8    | -8.87 ± 0.05 | 8.75 ± 0.05 | 109 ± 5.5      | -8.79 ± 0.13 | 8.69 ± 0.09 |
| T340I    | 80.05 ± 4.5    | -9.77 ± 0.14  | 9.66 ± 0.12  | 87.13 ± 4.0    | -9.06 ± 0.10 | 8.87 ± 0.07 | 102.1 ± 4.9    | -9.41 ± 0.11 | 9.29 ± 0.11 |
| N342S    | 89.22 ± 5.6    | -9.77 ± 0.16  | 9.71 ± 0.10  | 95.11 ± 1.8    | -8.68 ± 0.04 | 8.55 ± 0.05 | 93.31 ± 3.6    | -8.66 ± 0.09 | 8.49 ± 0.11 |
| V345I    | 93.51 ± 3.1    | -9.7 ± 0.08   | 9.65 ± 0.09  | 90.83 ± 2.0    | -8.74 ± 0.05 | 8.62 ± 0.05 | 93.19 ± 5.7    | -8.72 ± 0.15 | 8.56 ± 0.11 |
| V52A     | 15.86 ± 5.9    | -7.95 ± 0.54  | 7.14 ± 0.78  | NR             | NR           | NR          | NR             | NR           | NR          |
| R54W     | 39.75 ± 4.0    | -10.08 ± 0.21 | 9.66 ± 0.25  | NR             | NR           | NR          | 54.33 ± 4.0    | -9.09 ± 0.20 | 8.69 ± 0.20 |
| S87L     | 48.06 ± 4.1    | -9.06 ± 0.18  | 8.73 ± 0.22  | NR             | NR           | NR          | NR             | NR           | NR          |
| H131R    | 45.54 ± 3.8    | -9.47 ± 0.20  | 9.12 ± 0.22  | NR             | NR           | NR          | 17.84 ± 3.6    | -8.50 ± 0.49 | 7.61 ± 0.58 |
| I257F    | 47.84 ± 3.6    | -9.50 ± 0.18  | 9.17 ± 0.21  | NR             | NR           | NR          | 79.14 ± 3.0    | -9.25 ± 0.10 | 9.02 ± 0.14 |
| I309T    | 52.89 ± 2.9    | -9.41 ± 0.13  | 9.13 ± 0.17  | NR             | NR           | NR          | 58.42 ± 3.1    | -9.14 ± 0.13 | 8.78 ± 0.20 |
| C314R    | 57.12 ± 4.9    | -9.78 ± 0.22  | 9.52 ± 0.15  | NR             | NR           | NR          | 33.11 ± 2.9    | -8.75 ± 0.23 | 8.13 ± 0.36 |
| I112N    | 75.89 ± 12.5   | -7.66 ± 0.20  | 7.53 ± 0.15  | 43.35 ± 8.3    | -7.27 ± 0.18 | 6.78 ± 0.21 | 60.19 ± 3.3    | -8.00 ± 0.12 | 7.65 ± 0.21 |
| R125C    | NR             | NR            | NR           | NR             | NR           | NR          | NR             | NR           | NR          |
| L138P    | 56.13 ± 7.3    | -8.26 ± 0.22  | 7.99 ± 0.17  | NR             | NR           | NR          | 26.54 ± 5.1    | -7.89 ± 0.40 | 7.17 ± 0.46 |
| P80L     | NR             | NR            | NR           | NR             | NR           | NR          | NR             | NR           | NR          |

NR denotes that the experimental parameter could not be determined due to lack of a concentration-response curve.
